# Supplementary material for: NR2F1 stratifies dormant disseminated tumor cells in breast cancer patients
Source: PubMed Central journal article supplement (PMC6190561; doi:10.1186/s13058-018-1049-0), 2018-10-16

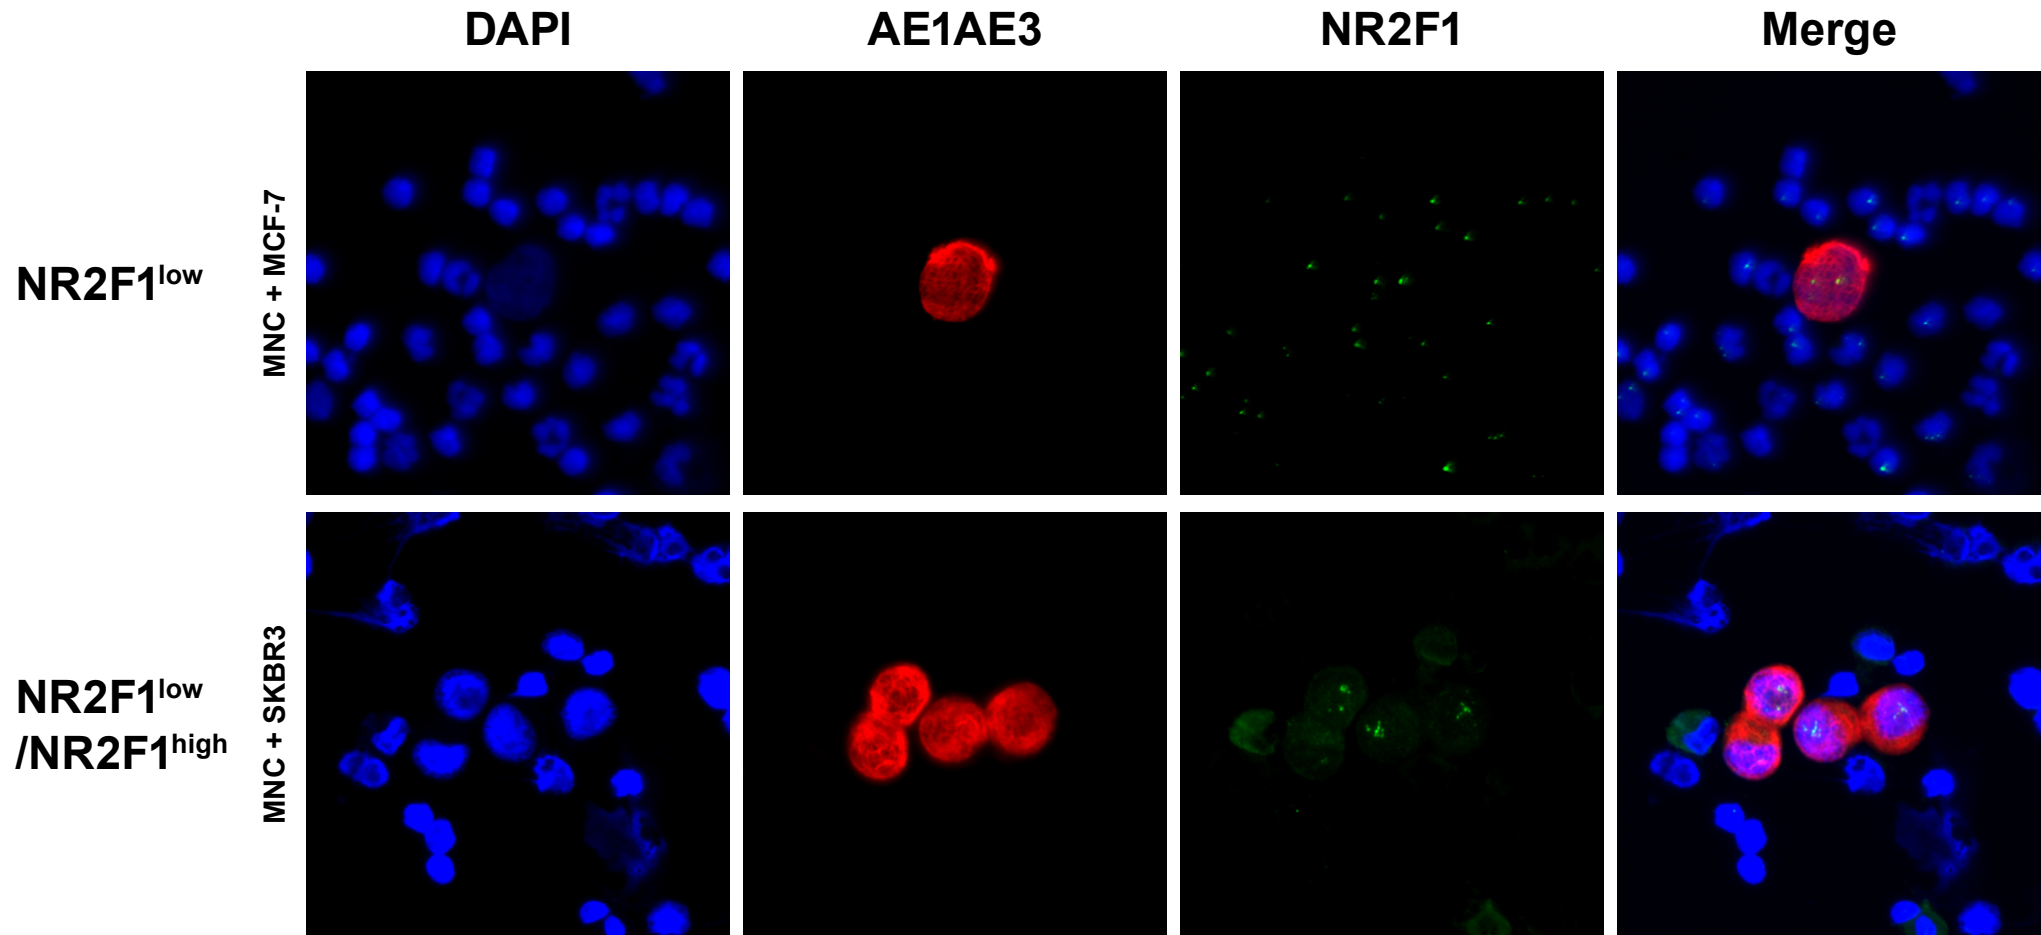

Supplement: 13058_2018_1049_MOESM2_ESM.pdf [file 13058_2018_1049_MOESM2_ESM.pdf]
