# Supplementary material for: NR2F1 stratifies dormant disseminated tumor cells in breast cancer patients
Source: Springer Nature journal article supplement (doi:10.1186/s13058-018-1049-0), 2018-10-09

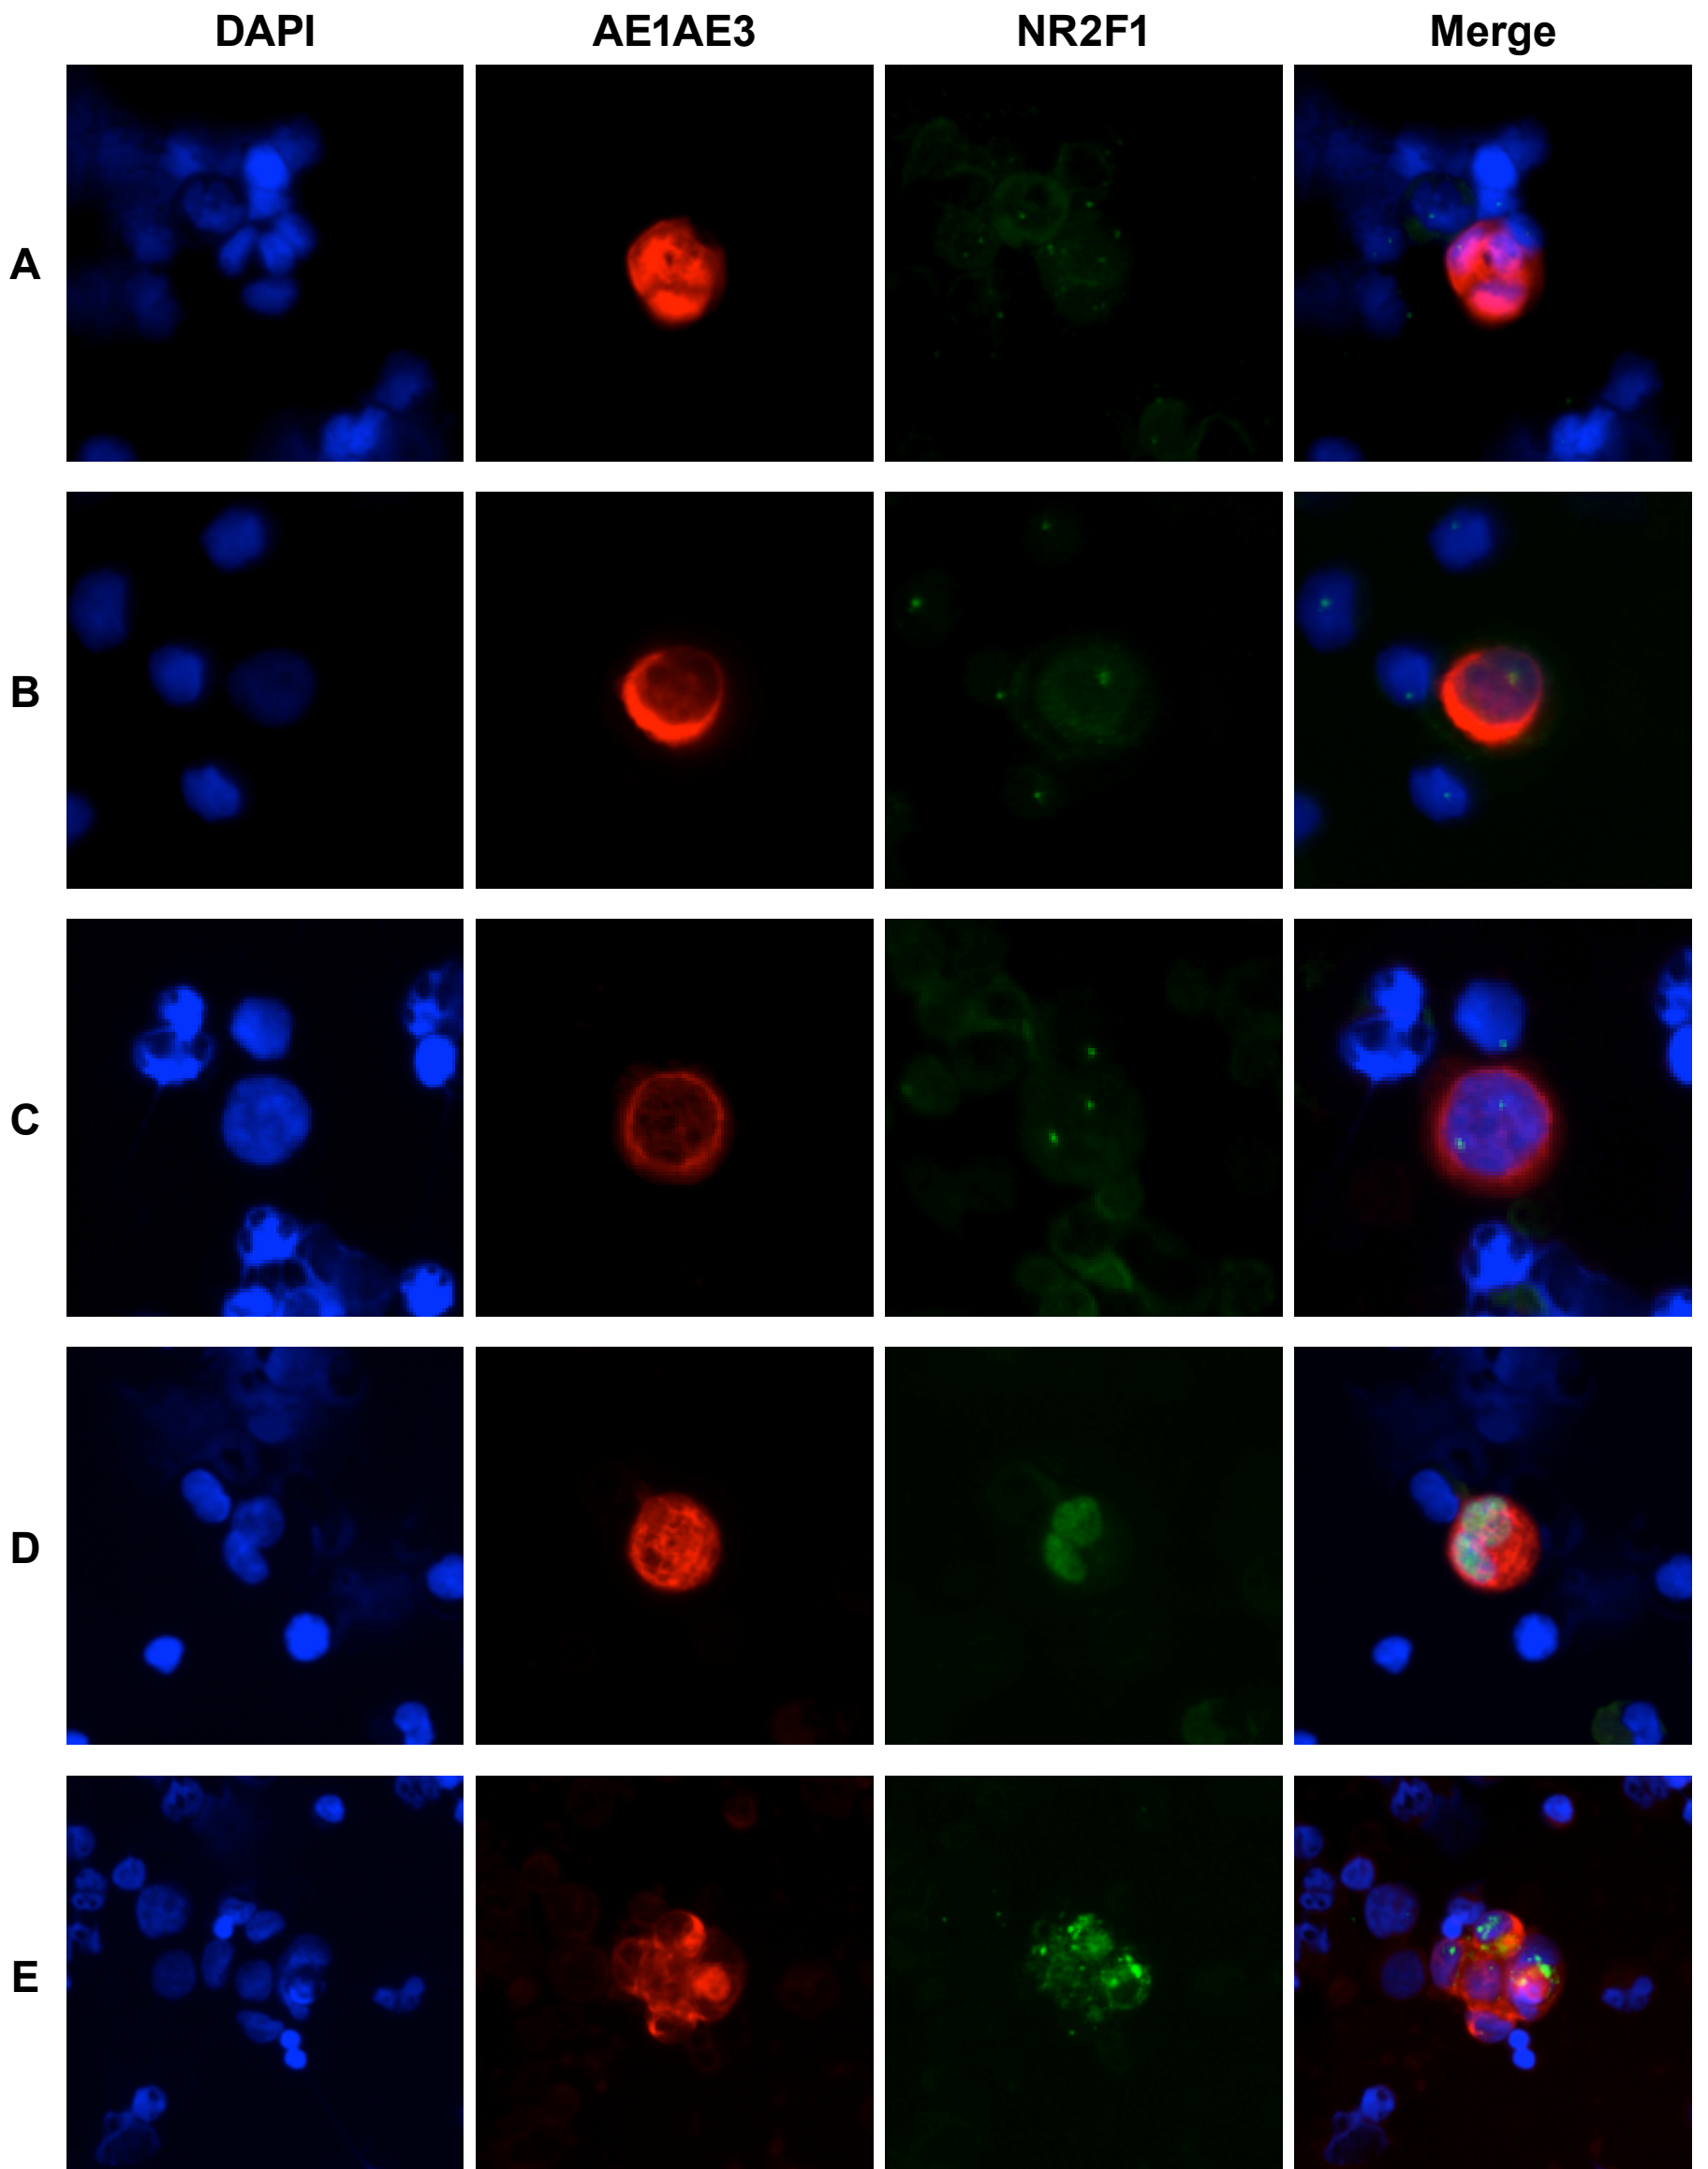

Supplement: MOESM3 [file 16200308]
